# Supplementary material for: Tough and stretchable ionic polyurethane foam for use in wearable devices
Source: Royal Society of Chemistry journal article supplement (doi:10.1039/d4sm00926f), 2024-01-01
Supplement: d4sm00926f1.pdf [file d4sm00926f1.pdf]

## **Tough and Stretchable Ionic Polyurethane Foam for Use in Wearable Devices**

Xuefeng Yan,<sup>1</sup> Yong Chen,<sup>1</sup> Jun Tan,<sup>2,\*</sup> Cailiang Zhang,<sup>3</sup> Zeming Xie,<sup>4</sup> Si Yu Zheng,<sup>4,\*</sup> Qi Wang,<sup>1,5,\*</sup> Zhijun Zhou,<sup>1</sup> Jintao Yang<sup>4,\*</sup>

<sup>1</sup> Zhejiang Hexin New Material Co., Ltd., Jiaxing 314000, P. R. China

<sup>2</sup> College of Biological, Chemical Science and Technology, Jiaxing University, Jiaxing 314001, P. R. China

<sup>3</sup> State Key Laboratory of Chemical Engineering, College of Chemical and Biological Engineering, Zhejiang University, Hangzhou 310027, P. R. China

<sup>4</sup> Zhejiang Key Laboratory of Plastic Modification and Processing Technology, College of Materials Science & Engineering, Zhejiang University of Technology, Hangzhou 310014, P. R. China

<sup>5</sup> Hexin Kuraray Micro Fiber Leather (Jiaxing) Co., Ltd., Jiaxing 314000, P. R. China

E-mails: [tanjunzjxu@126.com](mailto:tanjunzjxu@126.com) (Jun Tan), [zhengsiyu@zjut.edu.cn](mailto:zhengsiyu@zjut.edu.cn) (Si Yu Zheng), [wangqi@hexin-puleather.com](mailto:wangqi@hexin-puleather.com) (Qi Wang), [yangjt@zjut.edu.cn](mailto:yangjt@zjut.edu.cn) (Jintao Yang)

**Table S1. Composition of Samples.**

| <b>Sample</b> | <b>Molar ratio</b> |                  |               |            |
|---------------|--------------------|------------------|---------------|------------|
|               | <b>HDI</b>         | <b>PTMG-2000</b> | <b>i-diol</b> | <b>BDO</b> |
| <b>CPU1</b>   | 10                 | 5                | 1             | 4          |
| <b>CPU2</b>   | 10                 | 5                | 2             | 3          |
| <b>CPU3</b>   | 10                 | 5                | 3             | 2          |
| <b>CPU4</b>   | 10                 | 5                | 4             | 1          |

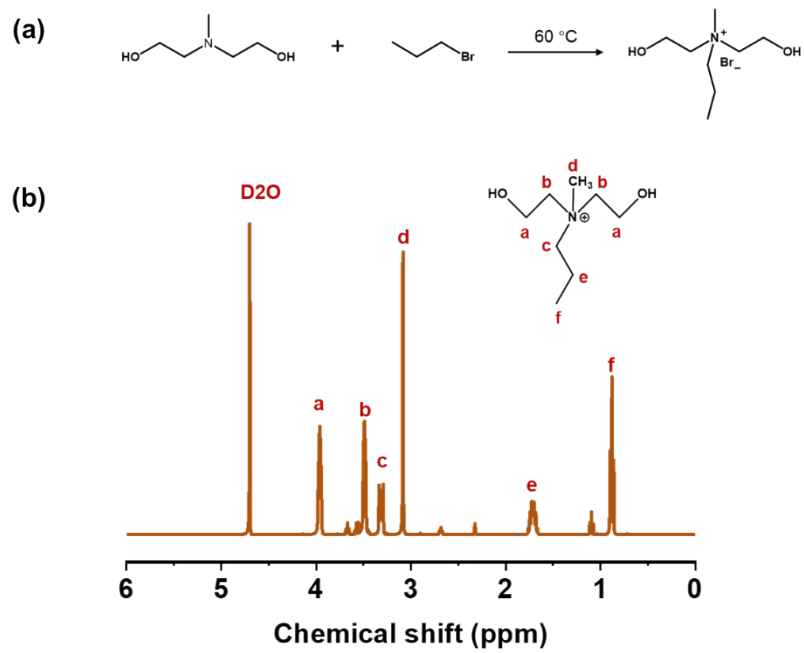

Figure S1. (a). Reaction routes for synthesis of i-diol. (b).  $^1\text{H}$  NMR spectra of i-diol monomer at 400 MHz,  $\text{D}_2\text{O}$ .

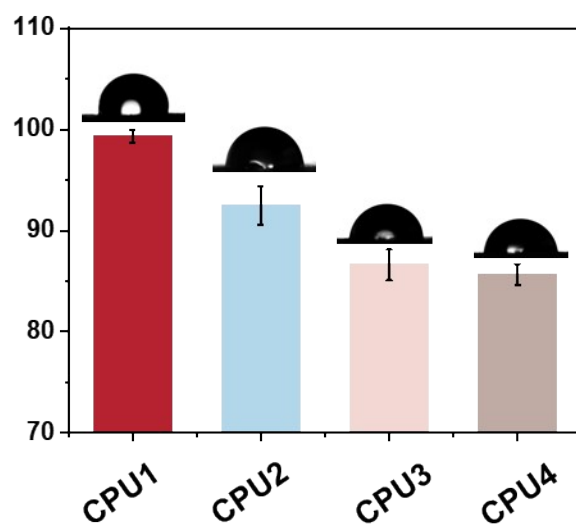

**Figure S2. Water contact angle of the surface of CPU samples.**

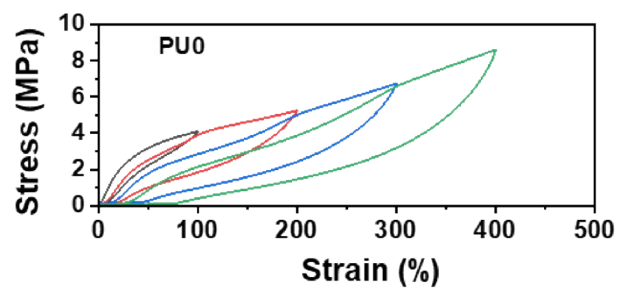

**Figure S3. Cyclic loading-unloading curves of PU0 elastomers with different i-diol content after stretching to different strain.**

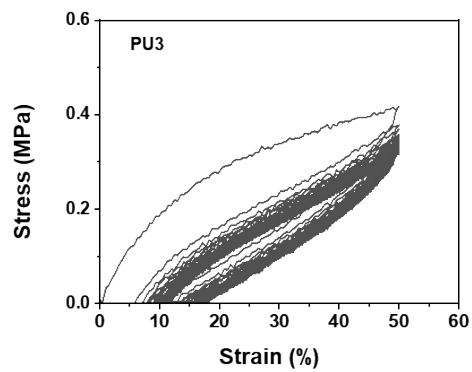

**Figure S4. Cyclic loading-unloading curves of the PU3 elastomer under 50% strain for 50 cycles.**

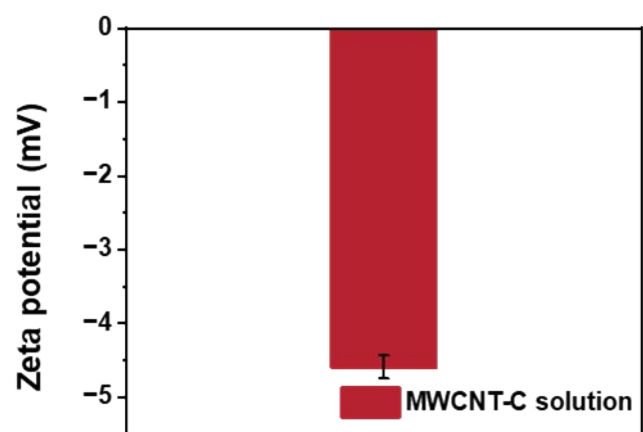

**Figure S5. Zeta potential of the carboxyl MWCNTs solution.**

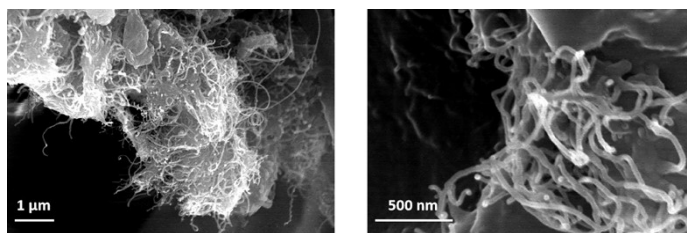

**Figure S6. SEM images of the cross-section of PU/MWCNTs-C foam.**



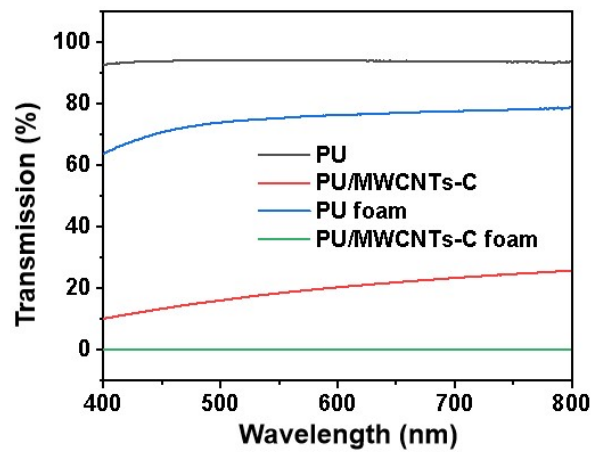

**Figure S7. UV-vis curves of bulk PU3, PU3 foam, CNTs absorbed bulk PU3 and PU3/MWCNTs-C foam.**

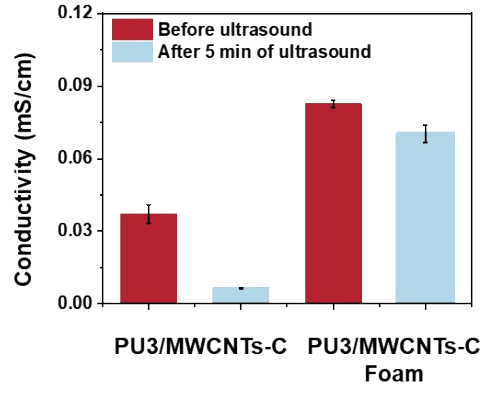

**Figure S8. The conductivity of bulk PU/MWCNTs-C and PU/MWCNTs-C foam before and after the ultrasonication treatment.**

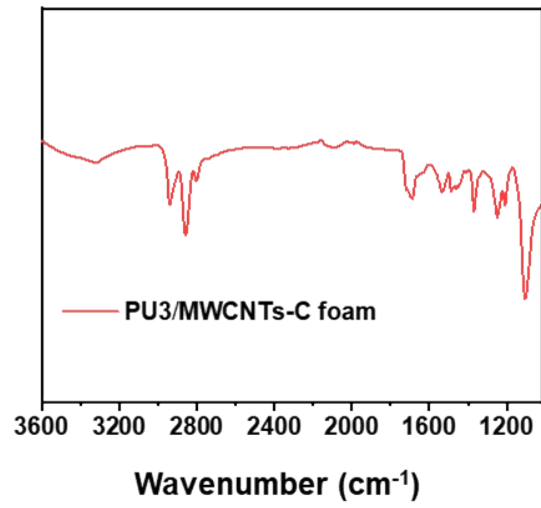

**Figure S9.** The FTIR spectrum of PU3/CNTs composite foam.

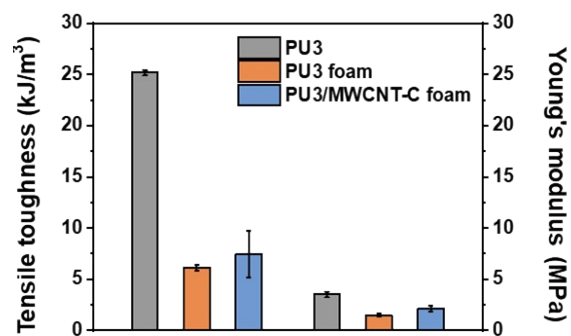

**Figure S10.** The tensile toughness and Young's modulus of the bulk PU3, PU3 foam and PU3/MWCNTs-C foam.
